# Supplementary material for: Rebalancing gene haploinsufficiency in vivo by targeting chromatin
Source: PubMed Central journal article supplement (PMC4895808; doi:10.1038/ncomms11688), 2016-06-03
Supplement: ncomms11688-s15.pdf [file ncomms11688-s15.pdf]

**Editorial Note:** this manuscript has been previously reviewed at another journal that is not operating a transparent peer review scheme. It was accepted without further rounds of review at Nature Communications.
